# Supplementary material
Source: publisher figshare collection journal article supplement (https://wiley.figshare.com/articles/dataset/_/3522152)
Supplement: Supplementary file 2 [file 1 › appendix-A.htm]

Ecological Archives E083-007-A1


### *Ecological Archives* E083-007-A1

### **Sebastian Diehl. 2002. Phytoplankton, light, and nutrients in a gradient of mixing depths: theory. *Ecology* 83:386–398.**

Appendix A. Uniqueness and local stability
of the interior equilibrium of the closed system model. Click here
for a pdf version.

For a given incident light
intensity, background turbidity, and mixing depth, light availability depends
only on total algal biomass. The integral in Eqs. 1a and 1c can therefore be
written as *P(R, W)*, where *P* is total algal production summed over
the mixed layer. Substitution of *P(R, W)* into Eqs. 1a and 1c and multiplication
of Eq. 1a with *z* yields

|  |  |
| --- | --- |
|  | (A.1) |
|  | (A.2) |
|  | (A.3) |

where 
(Eq. 1a). Eq. A.2 can be eliminated from the dynamical system described by Eqs.
A.1-A.3 because of the mass balance constraint specified by Eq. 1d. Eq. A.3
takes then on the form

|  |  |
| --- | --- |
| . | (A.4) |

Some properties of the dynamical
system specified by Eqs. A.1 and A.4 can be derived graphically, if the shape
of the isoclines  in the *W-R*-phase
plane is known. The slopes of these isoclines can be derived after setting Eqs.
A.1 and A.4 to zero and subsequently differentiating Eq. A.1 with respect to
*R* and Eq. A.4 with respect to *W*. This yields

|  |  |
| --- | --- |
|  | (A.5) |
| . | (A.6) |

Huisman and Weissing (1995)
have shown that  and that .
Because of the unidirectional nature of the light gradient, algal production
decreases with depth within the mixed layer. In contrast, because of homogeneous
mixing, losses occur uniformly over the entire mixed layer. Thus, algal biomass
can only be at steady state, if production exceeds losses at the top of the
mixed layer and if losses exceed production at the bottom of the mixed layer,
i.e., if  (Huisman
and Weissing 1995). Given these inequalities, the slope of the biomass isocline
in the *W-R* plane is positive and the slope of the nutrient isocline is
negative. Furthermore, algae require a minimal nutrient concentration, *Rc*,
to invade an empty system. The biomass isocline intersects the nutrient axis
at this threshold, which is given by the nutrient level at which algal production
exactly balances losses, i.e.,

|  |  |
| --- | --- |
|  | (A.7) |

Finally, the nutrient isocline intersects
the nutrient axis at *R = Rtot*. Thus, if *Rtot
< Rc*, the isoclines do not intersect and the system has only
one equilibrium state at which *R = Rtot* and *W =* 0.
Whenever *Rtot > Rc*, the isoclines do intersect
and the system has an interior equilibrium with *W\** and *R\** both
positive. Because of the opposite signs of the slopes of the isoclines, there
is only one interior equilibrium. This interior equilibrium is locally stable
(see below). The boundary equilibrium *R = Rtot* and *W =*0 is unstable, if *Rtot > Rc*. Because 
(Eq. 1b), *Rs\** > 0 for *Rtot > Rc*
and *Rs* = 0 for *Rtot < Rc*.

The stability of the interior
equilibrium is derived from the Jacobian matrix of the system described by Eqs.
A.1 and A.4. The elements of the Jacobian matrix are given by

where the asterisk indicates that
the matrix is evaluated at equilibrium. According to the Routh-Hurwitz criteria,
local stability requires that 
and  (e.g., Gurney
and Nisbet 1998). Both conditions are fulfilled. Therefore, if an interior
equilibrium exists, it is also locally stable.

Because, in an infinitly shallow
mixed layer, specific algal production is bounded by ,
whereas algal loss rate,  approaches
infinity, existence of the interior equilibrium requires a minimal mixing depth
to be exceeded. This depth is given by the depth *zc* at which
algal production exactly balances losses, i.e.,

|  |  |
| --- | --- |
| . | (A.8) |

Literature cited

Huisman,
J., and F. J. Weissing. 1995. Competition for nutrients and light in a mixed
water column: a theoretical analysis. American Naturalist **146**:536–564.

Gurney,
W. S. C., and R. M. Nisbet. 1998. Ecological Dynamics. Oxford University Press,
Oxford, UK.

---

  

[Back to E083-007]
